# Supplementary material for: 3D interconnected networks of a ternary hierarchical carbon nanofiber/MnO2/Ni(OH)2 architecture as integrated electrodes for all-solid-state supercapacitors
Source: Royal Society of Chemistry journal article supplement (doi:10.1039/c6ra13902g), 2016-01-01
Supplement: c6ra13902g1.pdf [file c6ra13902g1.pdf]

Supporting Information

**3D interconnected networks of ternary hierarchical carbon  
nanofiber/MnO<sub>2</sub>/Ni(OH)<sub>2</sub> architecture as integrated electrodes for all-  
solid-state supercapacitors**

Dan Zhou<sup>†</sup>, Hao Niu<sup>†</sup>, Huiming Lin, Xue Yang, He Jiang, Ting Zhang, Qian Wang,<sup>\*</sup>

Fengyu Qu<sup>\*</sup>

*College of Chemistry and Chemical Engineering, Harbin Normal University*

*Harbin 150025, P. R. China*

---

<sup>\*</sup>Corresponding authors. Tel. /fax: +86 451 88060653.

E-mail addresses: wangqianhrb@163.com (Q. Wang); qufengyuhsd@163.com (F. Qu).

<sup>†</sup> Both authors contributed equally to this work.

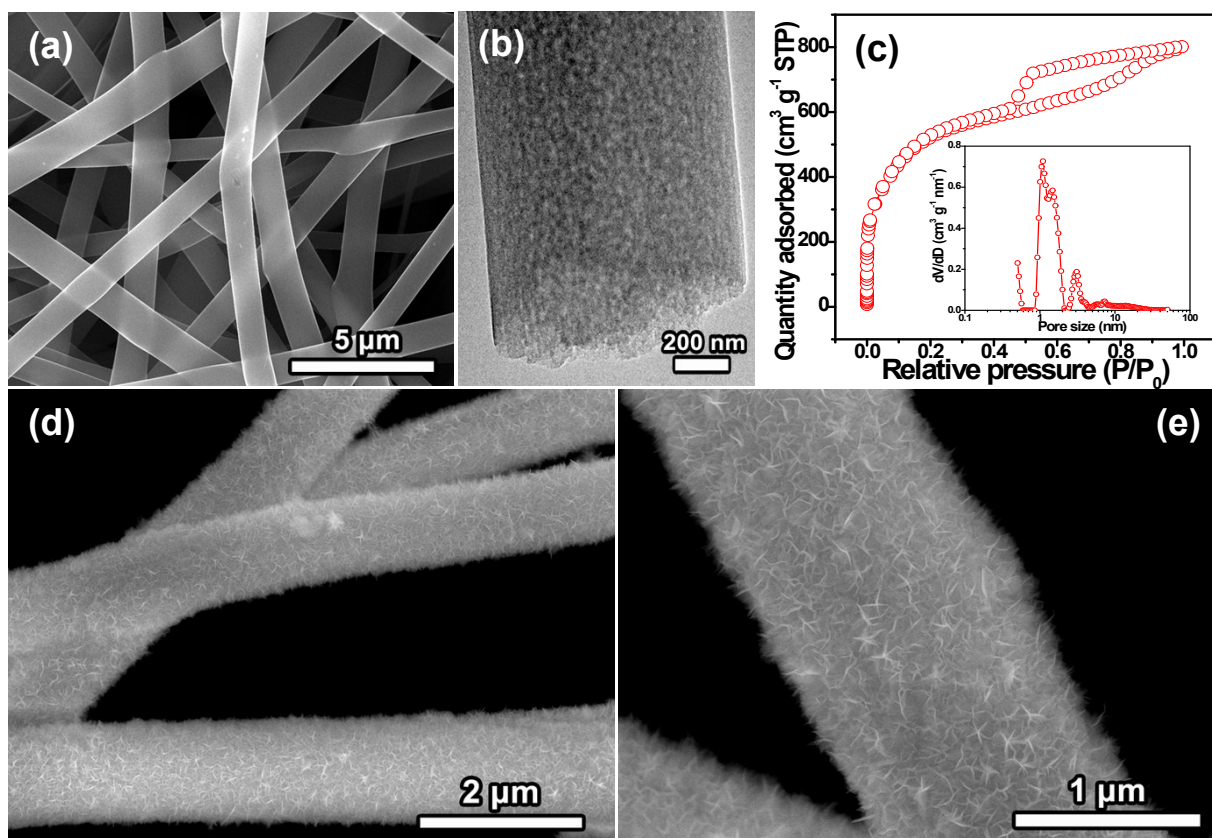

**Fig. S1.** (a) SEM and (b) TEM images of the prepared CF substrate. (c) Nitrogen adsorption-desorption isotherm of the CFs (Inset: the corresponding pore size distribution curve). (d and e) SEM images of CF@Ni(OH)<sub>2</sub> hybrid without the presence of MnO<sub>2</sub> layer.

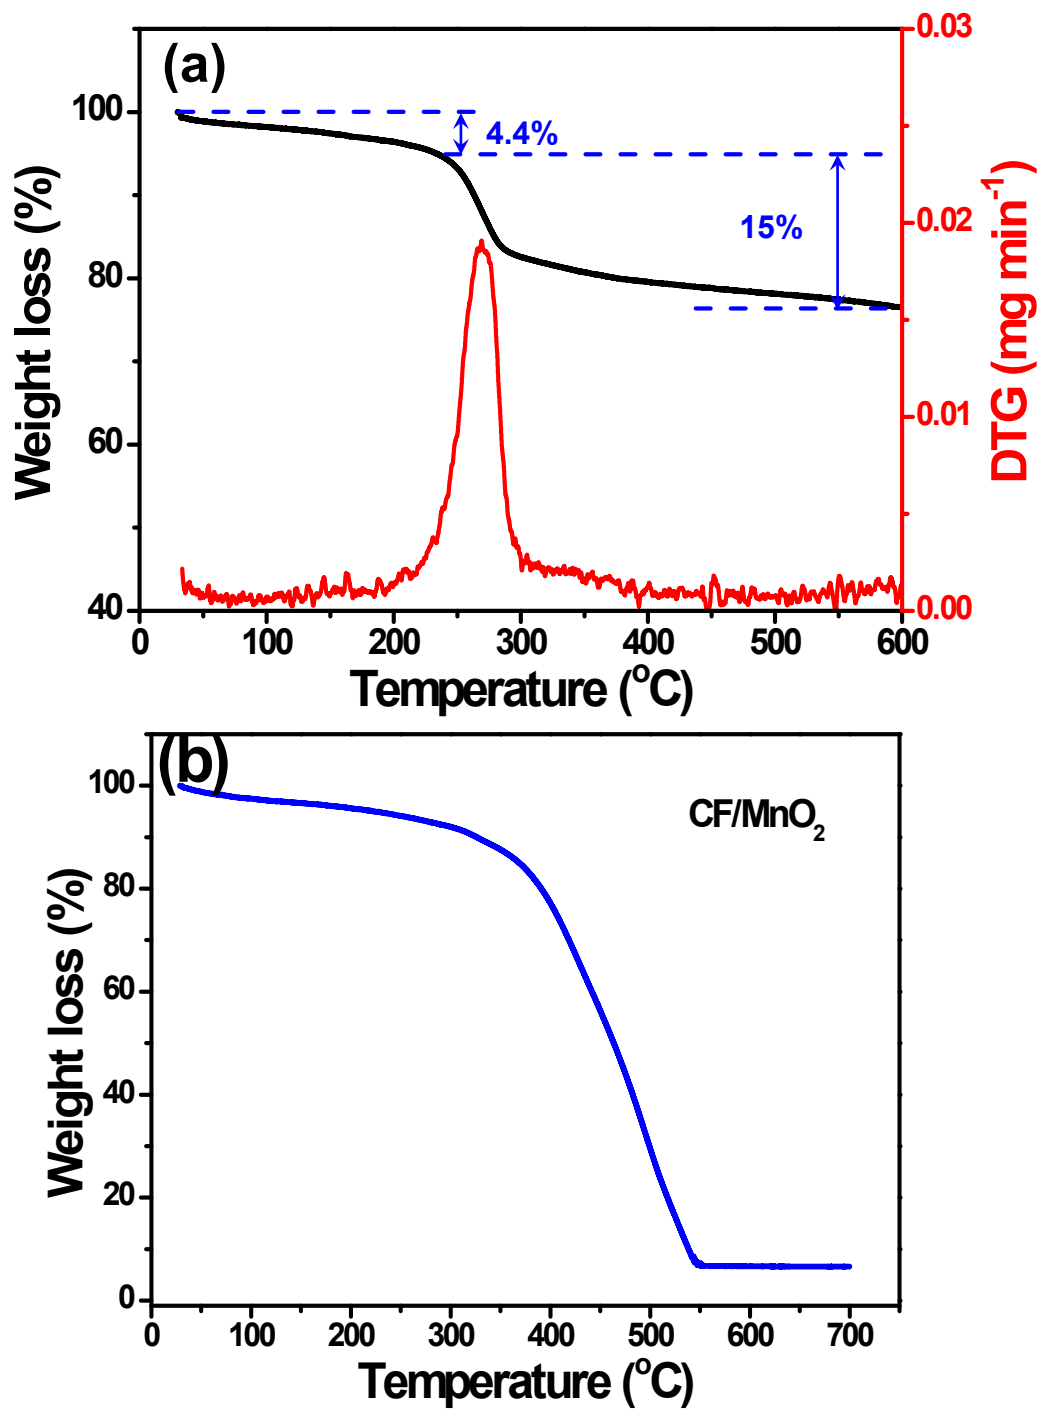

**Fig. S2.** (a) TGA and DTG curves of the as-prepared CF@MnO<sub>2</sub>@Ni(OH)<sub>2</sub> and (b) CF@MnO<sub>2</sub>.

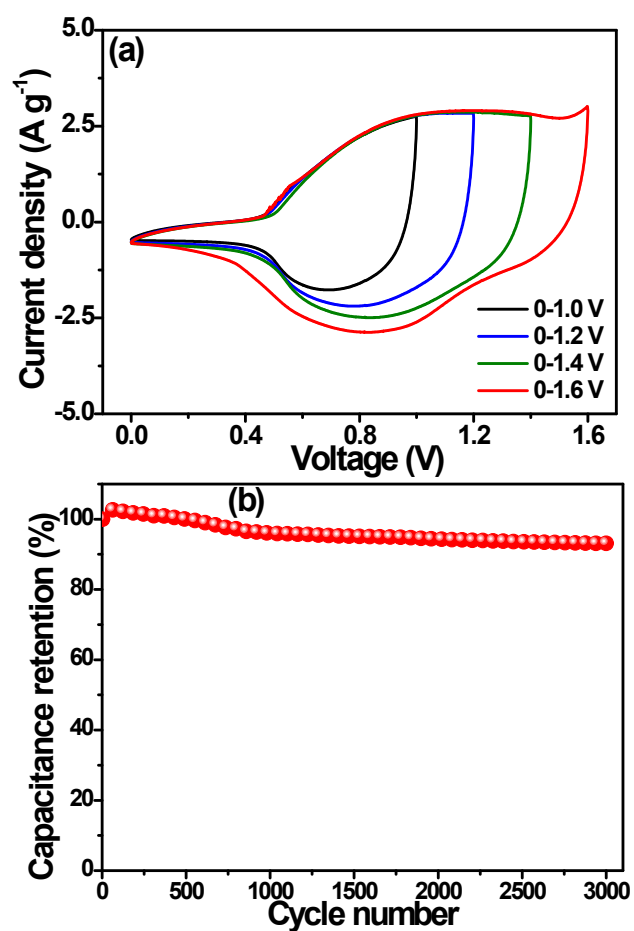

**Fig. S3.** (a) CV curves of the CFs//CF@MnO<sub>2</sub>@Ni(OH)<sub>2</sub> all-solid-state ASC device measured at different voltage windows with PVA/KOH gel electrolyte. (b) Cycling performance of the all-solid-state ASC device measured at 50 mV s<sup>-1</sup> over 3000 cycles.
